# Supplementary material for: A Comparison of the Anxiolytic Properties of Tofisopam and Diazepam: A Double-Blind, Randomized, Crossover, Placebo-Controlled Pilot Study
Source: Pharmaceuticals (Basel). 2024 Jan 22;17(1):140. doi: 10.3390/ph17010140 (PMC10820453; doi:10.3390/ph17010140)
Supplement: Supplementary file 1 [file pharmaceuticals-17-00140-s001.zip › pharmaceuticals-2772609-supplementary.pdf]

### **LIST OF WITHDRAWAL SYMPTOMS**

| GROUP                            | SYMPTOM                                    | SEVERITY |          |              |           |
|----------------------------------|--------------------------------------------|----------|----------|--------------|-----------|
|                                  |                                            | 0 – none | 1 – mild | 2 – moderate | 3 –severe |
| <b>I<br/>Adrenergic</b>          | Anxiety                                    |          |          |              |           |
|                                  | Restlessness                               |          |          |              |           |
|                                  | Psychomotor agitation                      |          |          |              |           |
|                                  | Loss of appetite                           |          |          |              |           |
|                                  | Excessive sweating                         |          |          |              |           |
|                                  | Nausea                                     |          |          |              |           |
|                                  | Vomiting                                   |          |          |              |           |
| <b>II<br/>Lethargy</b>           | Annoyance                                  |          |          |              |           |
|                                  | Tiredness                                  |          |          |              |           |
|                                  | Loss of libido                             |          |          |              |           |
|                                  | Lethargy                                   |          |          |              |           |
|                                  | Dysphoria                                  |          |          |              |           |
|                                  | Constipation                               |          |          |              |           |
| <b>III<br/>Sensory disorders</b> | Feeling dizzy                              |          |          |              |           |
|                                  | Loss of balance                            |          |          |              |           |
|                                  | Movement coordination disorders            |          |          |              |           |
|                                  | Tinnitus                                   |          |          |              |           |
|                                  | Perceptual (sensory) disorders             |          |          |              |           |
| <b>IV<br/>Confusion</b>          | Increased sensitivity to sounds and smells |          |          |              |           |
|                                  | Difficulty with concentrating              |          |          |              |           |
|                                  | Depersonalization                          |          |          |              |           |
|                                  | Difficulty with expressing thoughts        |          |          |              |           |
|                                  | Confusion                                  |          |          |              |           |
|                                  | Nightmares                                 |          |          |              |           |
| <b>V<br/>Neurasthenia</b>        | Weakness                                   |          |          |              |           |
|                                  | Tremor in the limbs                        |          |          |              |           |
| <b>VI<br/>Muscular symptoms</b>  | Muscle cramps                              |          |          |              |           |
|                                  | Fasciculation                              |          |          |              |           |
| <b>VII<br/>Individual</b>        | Insomnia                                   |          |          |              |           |
|                                  | Headaches                                  |          |          |              |           |
|                                  | Diarrhea                                   |          |          |              |           |
|                                  | Other psychotic reactions                  |          |          |              |           |
|                                  | Hallucinations                             |          |          |              |           |
|                                  | Seizures                                   |          |          |              |           |

#### **SYMPTOM SEVERITY SCALE**

0 – none; 1 – mild; 2 – moderate; 3 – severe
